# Supplementary material
Source: PubMed Central journal article supplement (PMC10722384)
Supplement: jama-e2323126-s002.pdf [file jama-e2323126-s002.pdf]

## Data Sharing Statement

### Data

**Data available:** No

### Additional Information

**Explanation for why data not available:** The data examined in this study is property of CMS, the Centers for Medicare and Medicaid Services. The data can be purchased or accessed through CMS. The data description can be found at: <https://resdac.org/cms-data/files/pde> The data documentation can be found at: <https://resdac.org/cms-data/files/pde/data-documentation> Further information for data requests can be found at: <https://www.cms.gov/medicare/prescription-drug-coverage/prescriptiondrugcovgenin/partddata>
